# Supplementary material
Source: MDPI journal article supplement (https://www.mdpi.com/2077-1312/9/8/872)
Supplement: s1 [file jmse-1326108-supplementary.pdf › jmse-1326108-supplementary.pdf]

## Supplementary material

Article: *Addressing cetacean-fishery interactions to inform a deep-sea ecosystem based management in the Gulf of Taranto (Northern Ionian Sea, Central Mediterranean Sea)*

**Pasquale Ricci** <sup>1,2</sup>, **Elisabetta Manea** <sup>3</sup>, **Giulia Cipriano** <sup>1,2\*</sup>, **Daniela Cascione** <sup>1</sup>, **Gianfranco D'Onghia** <sup>1,2</sup>, **Maurizio Ingrosso** <sup>1</sup>, **Carmelo Fanizza** <sup>4</sup>, **Porzia Maiorano** <sup>1,2</sup>, **Angelo Tursi** <sup>1,2</sup>, **Roberto Carlucci** <sup>1,2</sup>

\*Correspondence: giulia.cipriano@uniba.it; Department of Biology, University of Bari, Via Orabona 4, 70125, Bari, Italy

### Tables of Contents

Table S1. Matrix of the Mixed Trophic Impact (MTI) estimated for the FGs and the fishing gears... 2

**Table S1.** Matrix of the Mixed Trophic Impact (MTI) estimated for the FGs and the fishing gears.

[illegible]
